# Supplementary material for: Nilotinib versus Imatinib for Newly Diagnosed Chronic Myeloid Leukemia
Source: Atypon-hosted journal article supplement (doi:10.1056/nejmoa0912614), 2010-06-05

## Supplementary Appendix

This appendix has been provided by the authors to give readers additional information about their work.

Supplement to: Saglio G, Kim D-W, Issaragrisil S, et al. Nilotinib versus imatinib for newly diagnosed chronic myeloid leukemia. *N Engl J Med* 2010;362:2251-9. DOI: 10.1056/NEJMoa0912614.

(PDF updated June 16, 2010.)

## **Supplementary Appendix**

### Contents

ENESTnd Investigators – Page 2

Data Monitoring Board Members – Page 6

Supplementary Methods – Page 7

Supplementary Tables – Page 9

Supplementary Figure – Page 14

**ENESTnd Investigators**

In addition to the authors, the following investigators participated in the ENESTnd study:

**Argentina:** *Hospital Jose Maria, Buenos Aires* - B. Moiraghi; *Hospital Rodolfo Rossi, Buenos Aires* – M. Perez; **Austria:** *Landeskrankenhaus Salzburg, Salzburg* – R. Greil; *Univ. Klinik für Innere, Vienna* – P. Valent; **Belgium:** *Cliniques Universitaires UCL, Godinne* – A. Bosly; *Institut Jules Bordet, Bruxelles* – P. Martiat; *Universitair Ziekenhuis, Gent* – L. Noens; *Grand Hôpital de Charleroi, Charleroi* – M. André; *UZ Gasthuisberg, Leuven* – G. Verhoef; **Brazil:** *Hospital das Clínicas da Faculdade de Medicina, São Paulo* – M. Conchon; *Hospital de Clínicas da Unicamp, Campinas, São Paulo* – C. Souza; *Hospital de Base do Distrito Federal, Brasília* – A. Nonino; *Irmandade da Santa Casa de Misericórdia, São Paulo* – V. Hungria; *Hospital Brigadeiro, São Paulo* – M.A. Zanichelli; *Fundação Hospital, Jaú* – V. Colturato; **Canada:** *University of British Columbia, Vancouver, British Columbia* – D. Forrest; *Princess Margaret Hospital, Toronto, Ontario* – J.H. Lipton; *Tom Baker Cancer Center, Calgary Alberta* – M-L. Savoie; *Hôpital l'Enfant-Jésus, Québec* – R. Delage; *L'Hôtel-Dieu de Québec, Quebec* – M. Lalancette; **Colombia:** *Fundacion Santafe de Bogota, Bogota* – G. Quintero; *Clinical del Country, Bogota* – M. Gomez; **Czech Republic:** *Ustav hematologie a krevní transfuze, Praha* – H. Klamova; *Faculty Hospital, Olomouc* – E. Faber; **Denmark:** *Rigshospitalet, Copenhagen* – O. Weis Bjerrum; *Vejde Sygehus, Vejle* – H. Fredriksen, H. Vestergaard, C. Marcher; **Egypt:** *National Cancer Institute, Cairo* – H. Kamel; *NEMROCK Faculty of Medicine Cairo University, Cairo* – H. Elzawam; **Finland:** *Biomedicum Helsinki, Helsinki* – K. Porkka; *Turku University Central Hospital, Turku* – K. Remes; **France:** *Institut Bergonie, Bordeaux* – J. Reiffers; *CHU Hôpital Jean Bernard, Poitiers* – F. Guilhot; *CHRU Claude Huriez, Lille* – T. Facon; *Centre Hospitalier Henri Mondor, Créteil* – M. Tulliez; *CHU Brabois, Vandoeuvre les Nancy* - A-P. Guerci-Bresler; *Hôpital Edouard Herriot, Lyon* – F-E. Nicolini; *Institut Paoli Calmettes, Marseille* – A. Charbonnier; *Hôpital Saint Louis, Paris* – D. Rea; *CHU de Caen, Caen* – A. Johnson-Ansah; *CHU de Nice, Hôpital de l'Archet 1, Nice* – L. Legros; *Hôpital Hotel Dieu, Nantes* – J-L. Harousseau; *Hôpital De Purpan, Toulouse* – F. Rigal-Huguet; *CHRU de Rennes, Rennes* – M. Escoffre; *CHU d'Angers, Angers* – M. Gardembas; *Institute de Cancérologie de la Loire, Saint Priest en Jarez* – D. Guyotat; *Hôpital Albert Michallon, Grenoble* – J-Y. Cahn; **Germany:** *Universitätsklinikum Düsseldorf, Düsseldorf* – N. Gattermann; *Klinikum der J.W. Goethe Universitäts, Frankfurt* – O. Ottmann; *Universitätsklinikum Leipzig, Leipzig* – D. Niederwieser; *Medizinische Klinik der Universität Ulm, Ulm* – F. Stegelmann; *Universitätsklinikum Eppendorf, Hamburg* – P. Schafhausen, T Brümmendorf; *II. Medizinische Klinik und Poliklinik der TU München, München* – J. Duyster; *Praxis von Dr. Klaus Blumenstengel, Eisenach* – K. Blumenstengel; *Universität Klinikum Koeln, Koeln* – C. Scheid; *Universität Kiel, Kiel* – M. Kneba; **Hong Kong:** *Hong Kong University, Queen Mary Hospital* – Y-L. Kwong;

**Hungary:** *Egyesített Szent Istvan-Szent Laszlo, Budapest* – T. Masszi; **Italy:** *Azienda Ospedaliera Ospedali Riuniti S. Chiara, Pisa* – M. Petrini; *A.O.U. Policlinico, Umberto I'Università La Sapienza, Rome* – G. Alimena; *Azienda Ospedaliera Univ V. Emanuele, Ferrarotto, Catania* – F. Di Raimondo; *Azienda Ospedaliera di Bologna, St Orsola-Malpighi University Hospital, Bologna* – G. Rosti; *Azienda Ospedaliera Univ. Policlinico Federico II, Napoli* – B. Rotoli. F. Pane; *Azienda Ospedaliera Niguarda Ca' Granda-Università degli Studi di Mila, Milano* – E. Pungolino; *Università di Roma Tor Vergata, Rome* – S. Amadori; *Ospedale S. Eugenio, Rome* – E. Abruzzese; *Ospedale Civile dello Spirito Santo, Pescara* – G. Fioritoni; *Azienda Ospedaliera Universitaria Senese, Siena* – F. Lauria; *Azienda Ospedaliera Universitaria Careggi, Firenze* – A. Bosi; *Ospedale S. Maria della Misericordia, Perugia* – M. Martelli; *Azienda Ospedaliera Ospedali Riuniti de Bergamo, Bergamo* – A. Rambaldi; *Azienda Ospedaliera de Rilievo Nazionale A. Cardarelli, Napoli* – F. Ferrara; *Presidio Ospedali Riuniti Azienda Ospedaliera Bianchi-Melacrino-Morelli, Reggio Calabria* – F. Nobile; *Azienda Ospedaliera Universitaria S. Martino, Genova* – M. Gobbi, A.M.Carella; *Fodazione IRCCS Policlinico S. Matteo, Pavia* – E.M.Orlandi; *Azienda Ospedaliero-Universitaria, Ospedali Riuniti Umberto I-GM Lancisi-G Salesi, Ancona* – P. Leoni; *Azienda Ospedaliero-Universitaria Santa Maria Della Misericordia, Udine* – M. Tiribelli; *Azienda Ospedaliero 'ss. Antonio e Biagio e C. Arrigo, Alessandria* – A. Levis; **Japan:** *Hokkaido University Hospital, Sapporo* – M. Imamura; *Akita University Hospital, Akita* – N. Takahashi; *Gunma University School of Medicine, Maebashi* – N. Tsukamoto; *Tsukuba University Hospital, Tsukuba* – S. Chiba; *Jichi Medical University Hospital, Shimono* – T. Nagai; *Keio University Hospital, Tokyo* – S. Okamoto; *Tokyo Medical and Dental University Hospital, Tokyo* – O. Miura; *The University of Tokyo Hospital, Tokyo* – M. Kurokawa; *Hamamatsu University School of Medicine, University Hospital, Hamamatsu* – K. Ohnishi; *Niigata University Medical and Dental Hospital, Niigata* – K. Toba; *Kanazawa University Hospital, Kanazawa* – S. Nakao; *Nagoya University Hospital, Nagoya* – A. Tomita; *Japanese Red Cross Nagoya First Hospital, Nagoya* – K. Miyamura; *Osaka City University Hospital, Osaka* – M. Hino; *Kinki University Hospital, Osaka* – Y. Maeda; *Hiroshima University Hospital, Hiroshima* – A. Kimura; *Kumamoto University Hospital, Kumamoto* – T. Kawaguchi; *Nagasaki University Hospital of Medicine and Dentistry, Nagasaki* – Y. Miyazaki; *Chiba University Hospital, Chiba* – C. Nakaseko; *Saitama Medical University International Medical Center, Hidaka-City* – I. Jinnai, A. Matsuda; *Osaka University Hospital, Osaka* – I. Matsumura, J. Ishikawa; *Tokyo Medical University Hospital, Tokyo* – K. Ohyashiki; *The Hospital of Hyogo College of Medicine, Hyogo* – M. Okada; *Kanto Medical Center, Tokyo* – K. Usuki; *National Cancer Center Hospital, Tokyo* – Y. Kobayashi; *Mie University Hospital, Mie* – K. Ohishi; *Sapporo Hokuyu Hospital, Sapporo* – K. Imai; *Gunme Prefecture Saiseikai Maebashi Hospital, Maebashi* – S. Miyawaki; *Saitama Medical Center, Jichi Medical University, Saitama* – Y. Kanda; **Republic of Korea:** *Seoul National University Hospital Seoul* – S-Y. Park; *Seoul Chonnam National University Hwasun Hospital, Hwasun-gun* – H-J. Kim; *Kyung Pook National University Hospital, Taegu* – S-K. Sohn; *Asan Medical Center, Seoul* – K-H. Lee; *Samsung*

*Medical Center, Seoul – C-W. Jung; Malaysia: Hospital Ampang, Selangor – T. Chuan Ong; Mexico: Hospital Universitario “Dr José Eleuterio González” UANL, León – D. Gómez Almaguer; Hospital General de México, Distrito Federal – J. Kassack; Netherlands: Vrije Universiteit Medical Centre, Amsterdam – G.J. Ossenkuppele; Norway: Rikshospitalet-Radiumhospitalet HF, Oslo – T. Gedde-Dahl; Universtietessykehuset i Trondheim HF, Trondheim – H. Hjorth-Hansen; Poland: Centralny Szpital Kliniczny AM, Warszawa – W. Jedrzejczak; Adamemia Medyczna w Lublinie, Lublin – A. Dmoszynska; Wojewodzki Szpital Specjalistyczny w Rzeszowie, Rzeszow – J. Starzak-Dwozd; Samodzielny Publiczny Szpital Kliniczny UM, Katowice – J. Holowiecki, S Kyrz-Krzemień; Akademia Medyczna we Wrocławiu, Wrocław – K. Kuliczowski,; Russia: State Pavlov Medical University, Saint Petersburg – A. Zaritsky; Hematological Scientific Center of RAMS, Moscow – A. Turkina; Novosibirsk City Clinical Hospital, Novosibirsk – T. Pospelova; Singapore: Singapore General Hospital, Singapore – Y.T. Goh; National University Hospital, Singapore – L.P. Koh; Slovakia: Narodny onkologicky ustav, Bratislava – L. Demitrovicova; FNŠP Bratislava, pracoviski Petralka, Bratislava – M. Mistrik; South Africa: Wits Clinical Trial Center, Johannesburg – P. Ruff; Faculty of Health Sciences, Bloemfontein – V. Louw; Pretoria Academic Hospital, Pretoria – L.M. Dreosti; University of Cape Town, Cape Town – N. Novitzky; Mary Potter Oncology Centre, Pretoria – G. Cohen; Spain: Hospital Clinic I Provincial de Barcelona, Barcelona – F. Cervantes; Hospital Universitario de Salamanca, Salamanca – C. Cañizo; Hospital Universitario La Paz, Madrid – R. de Paz; Hospital Virgen de la Victoria, Malaga – S del Castillo; Hospital Clinico Universitario Santiago de Compostela, Santiago de Compostela – M. Perez Encinas; Hospital Universitario La Fe, Valencia – M. Sanz Alonso; Hospital General Universitario de Elche, Elche – F. Marin; Hospital Clinico Universitario de Valencia, Valencia – R. Pérez-López, J. Hernandez Boluda; Hospital Donostia, Donostia – M. A. Echeveste Gutierrez; Hospital Ramon Y Cajal, Madrid – J. Odriozola, P. Herrera; Hospital Universitario la Princesa, Madrid – J.L. Steegman; Hospital Universitario Marqués de Valdecilla, Santander – E. Conde; Hospital Universitario Virgen de las Nieves, Granada – P. Lopez; Hospital Universitario Miguel Servet, Zaragoza – P. Giraldo; Hospital Duran i Reynals de l'Hospitalet de Llobregat, Barcelona – C. Boque; Hospital de Basurto, Bilbao – B. Heredia; Hospital Vall D'Hebron, Barcelona – A. Julia Font; Hospital Universitario de Canarias, Tenerife – R.F. Rodriguez, M.J. Rodriguez; Complejo Universitario Hospital A Coruña, La Coruña - J Batlle; Sweden: Hematologiskt centrum, Stockholm – L. Stenke, S. Lehmann; Forskningsenheten Hematologi, Goteborg – H. Wadenvik; Blod mottagningen 50C, Uppsala – B. Simonsson; Hematol avd, Medicinkliniken, Umea – B. Markevärn; Medicinkliniken Lanssjukhuset, Sundsvall – A. Sjölander; VO Hematologi, Lund – J. Richter; Hematologsektionen, Orebro – M. Bjoreman; Medicinkliniken, Lulea – K. Myhr Eriksson; Switzerland: Hôpitaux Universitaires de Genève, Genève – Y. Chalandon; Taiwan: Chang-Gung Memorial Hospital, Lin-Ko – L-Y. Shih; National Taiwan University Hospital, Taipei – M. Yao; Chang Gung Memorial Hospital, Kaohsiung – M-C. Wang; Thailand: Ramathibodi Hospital, Bangkok – S. Jootar; Chulalongkorn Hospital, Bangkok – U.*

Bunworasate; **Turkey:** *Istanbul University Cerrahpasa Medical Faculty, Istanbul* – B. Ulkü; *Gazi University Medical Faculty, Ankara* – R. Haznedar; *Dokuz Eylul University Medical Faculty, Izmir* – B. Undar; *Cukurova University Medical Faculty, Adana* – B. Sahin; **United Kingdom:** *Hammersmith Hospital, London* – D. Marin; *St James University Hospital, Leeds* – G. Smith; *Nottingham City Hospital, Nottingham* – J. Byrne; *Gartnavel General Hospital, Glasgow* – T. Holyoake; **United States:** *Cleveland Clinic Foundation, Cleveland, Ohio* – M. Kalaycio; *Indiana Blood and Marrow Institute, Beech Grove, Indiana* – L. Akard; *Memorial Sloan-Kettering Cancer Center, New York, NY* – M. Heaney; *Michigan State University, Breslin Cancer Center, Lansing, Michigan* – A. Al-Janadi; *Hackensack University Medical Center, Hackensack, New Jersey* – S. Goldberg; *Wake Forest University Baptist Medical Center, Winston-Salem, North Carolina* – B. Powell; *Utah Cancer Specialists, Salt Lake City, Utah* – W.G. Harker; *University of North Carolina Healthcare, Chapel Hill, North Carolina* – T. Shea; *University of Iowa Hospitals and Clinics, Iowa City, Iowa* – R. Gingrich; *LSU Health Sciences Center, LSU School of Medicine, Shreveport, Louisiana* – J. Glass; *UCLA Medical Center, Los Angeles, California* – R. Paquette; *University of Cincinnati, Barrett Cancer Center, Cincinnati, Ohio* – C. Siegrist; *Hematology Oncology Consultants, Inc., St. Louis, Missouri* – M. Woodson; *Kaiser Permanente – California Northern, Vallejo, California* – L. Fehrenbacher; *Kaiser Permanente – California Southern, Baldwin Park, California* – H. Koh; *Tennessee Oncology, Nashville, Tennessee* – I. Flinn; *Chattanooga Oncology and Hematology Associates, PC, Chattanooga, Tennessee* – E. Arrowsmith; *Florida Cancer Specialists, Fort Myers, Florida* – T. Ervin; *Advanced Medical Specialties, Miami, Florida* – M. Guerra, H. Wallach; *Cancer Centers of North Carolina, Raleigh, North Carolina* – W. Berry; *Rocky Mountain Cancer Centers, Colorado Springs, Colorado* – J. Burke; *Cancer Centers of the Carolinas, Greenville, South Carolina* – W. Edenfield; *Cancer Care Centers of South Texas/HOAST, San Antonio, Texas* – G. Guzley; *Kansas City Cancer Center, LLC., Overland Park, Kansas* – J. Davis; *Tyler Cancer Center, Tyler, Texas* – D. Richards; *Missouri Cancer Associates, Columbia, Missouri* – D. Schlossman; *Northwest Cancer Specialists, Vancouver, Washington* – K. Kolibaba; *Cancer Centers of Florida, P.A., Ocoee, Florida* – C. Alemany; *Texas Cancer Center, Dallas, Texas* – M. Savin; *Florida Cancer Institute, New Port Richey, Florida* – G. Robbins; **Venezuela:** *Banco Municipal de Sangre del Distrito Capital, Caracas* – J. Lopez.

**Data Monitoring Board Members**

Prof. John M. Goldman, DM, FRCP  
Chair (Hematology/Oncology)  
Department of Haematology  
Imperial College of London at Hammersmith Hospital  
Du Cane Road  
London W12 0NN, UK  
Tel: +44 7802 201 950  
j.goldman@imperial.ac.uk

John Camm, MD  
DMC member (Cardiologist) Department of Cardiac and Vascular Sciences  
St. George's University  
Cranmer Terrace  
London SW17 0RE, UK  
Tel: +44 (0) 20 8725 3414  
Fax: +44 (0) 20 8767 7141  
jcam@sgul.ac.uk

Charles A. Schiffer, MD  
DMC member (Hematology/Oncology)  
Professor of Medicine and Oncology  
Director, Leukemia/Lymphoma Multidisciplinary Group  
Barbara Ann Karmanos Cancer Institute  
4100 John R  
Detroit, MI 48201  
Tel: 313-576-8737  
Fax: 313-576-8767  
schiffer@karmanos.org

Daniel J. Sargent, PhD  
DMC member (BioStatistician)  
Department of Health Sciences Research  
Mayo Clinic  
200 First Street SW  
Rochester, MN 55905  
Tel: 507-284-5380  
Fax: 507-266-2477  
sargent.daniel@mayo.edu

## Supplementary Methods

### *Other secondary end points*

Other secondary end points included rate of MMR and CCyR over time; time to and duration of MMR and CCyR; rate of BCR-ABL/ABL ratio of  $\leq 0.01\%$  and  $\leq 0.0032\%$  by international scale at 12 months; event-free survival (EFS; event defined as loss of CHR, loss of PCyR, loss of CCyR, progression to AP/blast crisis [BC], or death from any cause during treatment); PFS (defined as progression to AP/BC or death from any cause during treatment); progression to AP/BC (defined as progression to AP/BC or CML-related death); OS; safety; dose intensity; and pharmacokinetics.

### *Statistical Analysis*

The primary analysis was performed on the intent-to-treat (ITT) population when the last patient completed 12 cycles of therapy (1 cycle=28 days). Patients who left the study early or those without sufficient data for any other reason were included in the ITT analysis as nonresponders. Patients with atypical transcripts at baseline were also considered nonresponders. Two primary comparisons were made by using a step-down procedure: nilotinib 400 mg BID was compared with imatinib first, and then nilotinib 300 mg BID was compared with imatinib. A 2-sided Cochran–Mantel–Haenszel (CMH) test stratified by Sokal risk group was used at a 5% level to test statistical significance of response rates. All time-to-event comparisons were presented as Kaplan–Meier curves and compared using the log-rank test stratified by Sokal risk group.

All patients who received at least 1 dose of study drug were included in the safety analysis. Safety assessments were based mainly on the frequency of adverse events (AEs), the number of patients with notably abnormal laboratory values, and the number of patients with notably abnormal electro- and echocardiogram data. Patients were monitored and centrally evaluated for QT interval prolongation and left ventricular ejection fraction (LVEF).

The sample-size calculation for this study was based on a 15% (55% vs 40%) increase in MMR rate for the nilotinib arms vs imatinib. The study had 90% power to detect such a difference (at the 5% significance level based on stratified CMH test).

#### *Ethics and Study Management*

This study was conducted in accordance with the Declaration of Helsinki and the protocol was reviewed by the ethics committee or review board at each participating institution. All patients were required to give written informed consent. This study was registered at [www.clinicaltrials.gov](http://www.clinicaltrials.gov) as #NCT00471497. Novartis employees were blinded from treatment information until database lock.

Supplementary Table 1. Patient Disposition (ITT Population).

| Disposition/Reason                                   | Nilotinib<br>300 mg BID<br>N=282 | Nilotinib<br>400 mg BID<br>N=281 | Imatinib<br>400 mg QD<br>N=283 |
|------------------------------------------------------|----------------------------------|----------------------------------|--------------------------------|
|                                                      | n (%)                            | n (%)                            | n (%)                          |
| <b>All randomization patients</b>                    | 282 (100)                        | 281 (100)                        | 283 (100)                      |
| <b>Randomized but not treated</b>                    | 3 (1)                            | 3 (1)                            | 4 (1)                          |
| <b>Still on study</b>                                | 268 (95)                         | 271 (96)                         | 274 (97)                       |
| <b>Still on treatment</b>                            | 236 (84)                         | 230 (82)                         | 224 (79)                       |
| <b>Discontinued</b>                                  | 46 (16)                          | 51 (18)                          | 59 (21)                        |
| <b>Discontinuation reason</b>                        |                                  |                                  |                                |
| Adverse event(s)                                     | 13 (5)                           | 26 (9)                           | 21 (7)                         |
| Abnormal laboratory value(s)                         | 6 (2)                            | 5 (2)                            | 3 (1)                          |
| Abnormal test procedure result(s)                    | 0 (0)                            | 1 (<1)                           | 1 (<1)                         |
| Subject's condition no longer requires<br>study drug | 1 (<1)                           | 0 (0)                            | 0 (0)                          |
| Subject withdrew consent                             | 6 (2)                            | 5 (2)                            | 3 (1)                          |
| Lost to follow-up                                    | 2 (<1)                           | 2 (<1)                           | 1 (<1)                         |
| Death                                                | 2 (<1)                           | 0 (0)                            | 0 (0)                          |
| Disease progression                                  | 2 (<1)                           | 2 (<1)                           | 10 (4)                         |
| Protocol deviation                                   | 4 (1)                            | 5 (2)                            | 4 (1)                          |
| Suboptimal response/treatment failure                | 10 (4)                           | 5 (2)                            | 16 (6)                         |

**Supplementary Table 2. BCR-ABL Ratio (IS) Categories at 12 Months (ITT Population).**

|                                  | <b>Nilotinib<br/>300 mg<br/>BID<br/>N=282<br/>n (%)</b> | <b>Nilotinib<br/>400 mg<br/>BID<br/>N=281<br/>n (%)</b> | <b>Imatinib<br/>400 mg<br/>QD<br/>N=283<br/>n (%)</b> |
|----------------------------------|---------------------------------------------------------|---------------------------------------------------------|-------------------------------------------------------|
| <b>BCR-ABL ratio categories</b>  |                                                         |                                                         |                                                       |
| ≤0.0032%                         | 12 (4.3)                                                | 13 (4.6)                                                | 1 (0.4)                                               |
| >0.0032 - ≤0.01%                 | 21 (7.4)                                                | 11 (3.9)                                                | 10 (3.5)                                              |
| >0.01 - ≤0.1%                    | 91 (32.3)                                               | 96 (34.2)                                               | 52 (18.4)                                             |
| >0.1 - ≤1%                       | 95 (33.7)                                               | 89 (31.7)                                               | 95 (33.6)                                             |
| >1 - ≤10%                        | 20 (7.1)                                                | 27 (9.6)                                                | 61 (21.6)                                             |
| >10%                             | 3 (1.1)                                                 | 4 (1.4)                                                 | 16 (5.7)                                              |
| Atypical transcripts at baseline | 5 (1.8)                                                 | 1 (0.4)                                                 | 2 (0.7)                                               |
| Missing and/or discontinued      | 35 (12.4)                                               | 40 (14.2)                                               | 46 (16.3)                                             |
| Ongoing                          | 2 (0.7)                                                 | 1 (0.4)                                                 | 0                                                     |
| Discontinued due to PD/death     | 4 (1.4)                                                 | 2 (0.7)                                                 | 8 (2.8)                                               |
| Discontinued due to other reason | 29 (10.3)                                               | 37 (13.2)                                               | 38 (13.4)                                             |
| PD, progressive disease          |                                                         |                                                         |                                                       |

**Supplementary Table 3. BCR-ABL Ratio (IS) for Patients With Available Molecular Analysis at 15 and 18 Months of Therapy.**

|                     | <b>Nilotinib<br/>300 mg BID<br/>N=282<br/>n (%)</b> | <b>Nilotinib<br/>400 mg BID<br/>N=281<br/>n (%)</b> | <b>Imatinib<br/>400 mg QD<br/>N=283<br/>n (%)</b> |
|---------------------|-----------------------------------------------------|-----------------------------------------------------|---------------------------------------------------|
| <b>At 15 months</b> |                                                     |                                                     |                                                   |
| Number observed     | 154                                                 | 155                                                 | 145                                               |
| ≤0.0032%            | 11 (7.1)                                            | 15 (9.7)                                            | 7 (4.8)                                           |
| ≤0.01%              | 22 (14.3)                                           | 31 (20.0)                                           | 13 (9.0)                                          |
| ≤0.1%               | 87 (56.5)                                           | 88 (56.8)                                           | 48 (33.1)                                         |
| ≤1%                 | 145 (94.2)                                          | 142 (91.6)                                          | 116 (80.0)                                        |
| ≤10%                | 153 (99.4)                                          | 155 (100)                                           | 137 (94.5)                                        |
| <b>At 18 months</b> |                                                     |                                                     |                                                   |
| Number observed     | 83                                                  | 78                                                  | 89                                                |
| ≤0.0032%            | 11 (13.3)                                           | 9 (11.5)                                            | 2 (2.2)                                           |
| ≤0.01%              | 20 (24.1)                                           | 17 (21.8)                                           | 6 (6.7)                                           |
| ≤0.1%               | 50 (60.2)                                           | 44 (56.4)                                           | 23 (25.8)                                         |
| ≤1%                 | 79 (95.2)                                           | 73 (93.6)                                           | 76 (85.4)                                         |
| ≤10%                | 83 (100)                                            | 78 (100)                                            | 85 (95.5)                                         |

**Supplementary Table 4. Best Cytogenetic Response by 12 Months (ITT Population).**

|                                   | <b>Nilotinib<br/>300 mg<br/>BID<br/>N=282<br/>n (%)</b> | <b>Nilotinib<br/>400 mg<br/>BID<br/>N=281<br/>n (%)</b> | <b>Imatinib<br/>400 mg<br/>QD<br/>N=283<br/>n (%)</b> |
|-----------------------------------|---------------------------------------------------------|---------------------------------------------------------|-------------------------------------------------------|
| Major cytogenetic response (MCyR) | 238 (84.4)                                              | 227 (80.8)                                              | 219 (77.4)                                            |
| Complete (CCyR)                   | 226 (80.1)                                              | 219 (77.9)                                              | 184 (65.0)                                            |
| Partial (PCyR)                    | 12 (4.3)                                                | 8 (2.8)                                                 | 35 (12.4)                                             |
| Minor                             | 3 (1.1)                                                 | 2 (0.7)                                                 | 7 (2.5)                                               |
| Minimal                           | 3 (1.1)                                                 | 4 (1.4)                                                 | 7 (2.5)                                               |
| None                              | 0                                                       | 3 (1.1)                                                 | 9 (3.2)                                               |
| Ph- at baseline                   | 0                                                       | 0                                                       | 1 (0.4)                                               |
| Missing                           | 38 (13.5)                                               | 45 (16.0)                                               | 40 (14.1)                                             |
| Ongoing                           | 35 (12.4)                                               | 40 (14.2)                                               | 35 (12.4)                                             |
| Discontinued due to PD/death      | 0                                                       | 0                                                       | 0                                                     |
| Discontinued due to other reason  | 3 (1.1)                                                 | 5 (1.8)                                                 | 5 (1.8)                                               |

Ph-, Philadelphia Chromosome negative; PD, progressive disease

**Supplementary Table 5. Number (%) of Patients With Serious Adverse Events Suspected to Be Related to Study Drug by System Organ Class and Treatment (Safety Population).**

|                                                                           | All Grades                                   |                                              |                                            | CTC Grade 3 or 4                             |                                              |                                            |
|---------------------------------------------------------------------------|----------------------------------------------|----------------------------------------------|--------------------------------------------|----------------------------------------------|----------------------------------------------|--------------------------------------------|
|                                                                           | Nilotinib<br>300 mg<br>BID<br>N=279<br>n (%) | Nilotinib<br>400 mg<br>BID<br>N=277<br>n (%) | Imatinib<br>400 mg<br>QD<br>N=280<br>n (%) | Nilotinib<br>300 mg<br>BID<br>N=279<br>n (%) | Nilotinib<br>400 mg<br>BID<br>N=277<br>n (%) | Imatinib<br>400 mg<br>QD<br>N=280<br>n (%) |
| <b>Any system organ class</b>                                             | 11 (3.9)                                     | 24 (8.7)                                     | 13 (4.6)                                   | 7 (2.5)                                      | 22 (7.9)                                     | 11 (3.9)                                   |
| Blood and lymphatic system disorders                                      | 6 (2.2)                                      | 10 (3.6)                                     | 4 (1.4)                                    | 6 (2.2)                                      | 10 (3.6)                                     | 4 (1.4)                                    |
| Cardiac disorders                                                         | 3 (1.1)                                      | 1 (0.4)                                      | 0                                          | 0                                            | 0                                            | 0                                          |
| Congenital, familial, and genetic disorders                               | 0                                            | 0                                            | 1 (0.4)                                    | 0                                            | 0                                            | 1 (0.4)                                    |
| Ear and labyrinth disorders                                               | 1 (0.4)                                      | 0                                            | 0                                          | 0                                            | 0                                            | 0                                          |
| Endocrine disorders                                                       | 0                                            | 1 (0.4)                                      | 0                                          | 0                                            | 1 (0.4)                                      | 0                                          |
| Gastrointestinal disorders                                                | 1 (0.4)                                      | 5 (1.8)                                      | 2 (0.7)                                    | 1 (0.4)                                      | 4 (1.4)                                      | 1 (0.4)                                    |
| General disorders and administration site conditions                      | 1 (0.4)                                      | 1 (0.4)                                      | 1 (0.4)                                    | 0                                            | 1 (0.4)                                      | 0                                          |
| Hepatobiliary disorders                                                   | 0                                            | 4 (1.4)                                      | 1 (0.4)                                    | 0                                            | 2 (0.7)                                      | 1 (0.4)                                    |
| Infections and infestations                                               | 0                                            | 1 (0.4)                                      | 1 (0.4)                                    | 0                                            | 0                                            | 1 (0.4)                                    |
| Investigations                                                            | 0                                            | 3 (1.1)                                      | 0                                          | 0                                            | 2 (0.7)                                      | 0                                          |
| Metabolism and nutrition disorders                                        | 1 (0.4)                                      | 0                                            | 1 (0.4)                                    | 0                                            | 0                                            | 1 (0.4)                                    |
| Musculoskeletal and connective tissue disorders                           | 0                                            | 1 (0.4)                                      | 1 (0.4)                                    | 0                                            | 1 (0.4)                                      | 1 (0.4)                                    |
| Neoplasms benign, malignant, and unspecified (including cysts and polyps) | 0                                            | 1 (0.4)                                      | 1 (0.4)                                    | 0                                            | 1 (0.4)                                      | 1 (0.4)                                    |
| Nervous system disorders                                                  | 0                                            | 1 (0.4)                                      | 1 (0.4)                                    | 0                                            | 1 (0.4)                                      | 0                                          |
| Reproductive system and breast disorders                                  | 0                                            | 0                                            | 1 (0.4)                                    | 0                                            | 0                                            | 1 (0.4)                                    |
| Respiratory, thoracic, and mediastinal disorders                          | 0                                            | 3 (1.1)                                      | 0                                          | 0                                            | 2 (0.7)                                      | 0                                          |

Figure 1. Kaplan-Meier Estimate of Time to AP/BC (ITT Population).

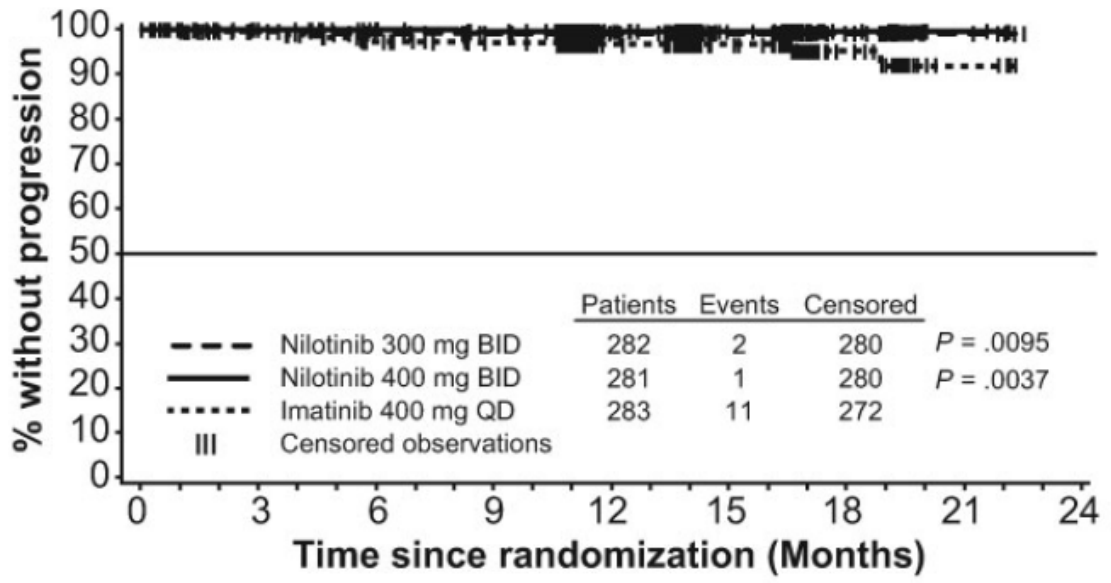

Supplement: nejm_saglio_2251sa1.pdf [file nejm_saglio_2251sa1.pdf]
